# Supplementary material for: Integration of a plasmonic semiconductor with a metal–organic framework: a case of Ag/AgCl@ZIF-8 with enhanced visible light photocatalytic activity
Source: Royal Society of Chemistry journal article supplement (doi:10.1039/c4ra11364k), 2014-01-01
Supplement: c4ra11364k1.pdf [file c4ra11364k1.pdf]

## Supporting Information

### **Integration of plasmonic semiconductor with metal–organic framework: A case of Ag/AgCl@ZIF-8 with enhanced visible light photocatalytic activity**

Shu-Tao Gao, Wei-Hua Liu, Ning-Zhao Shang, Cheng Feng, Qiu-Hua Wu, Zhi Wang, Chun Wang\*

*College of Science, Agricultural University of Hebei, Baoding 071000, China*

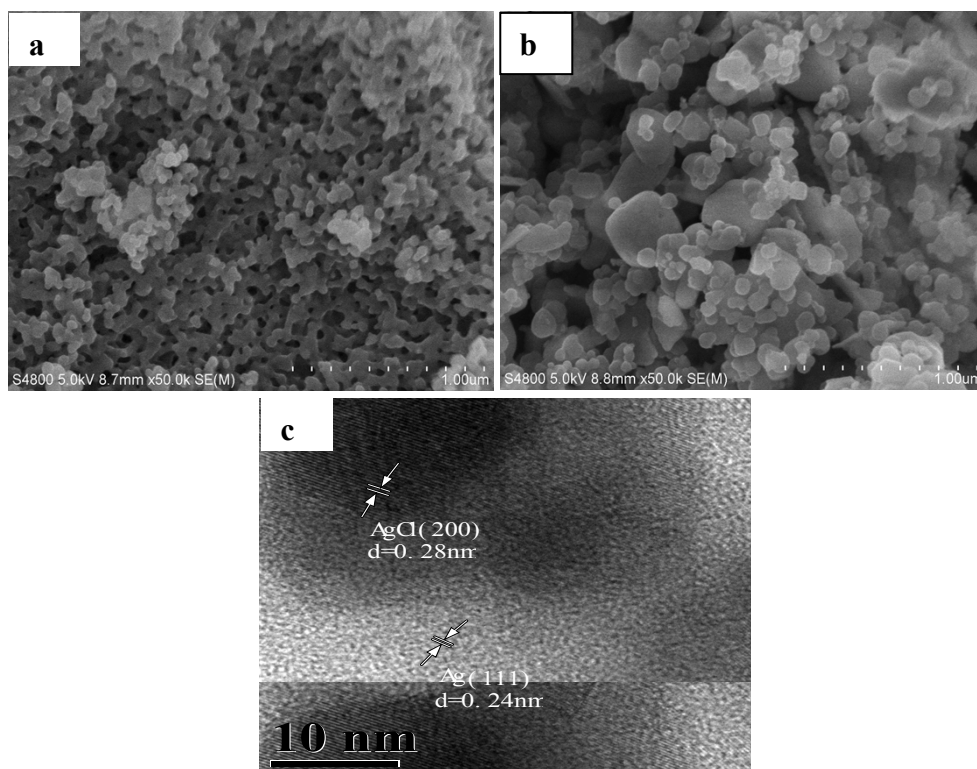

**Fig. S1** SEM images of (a) ZIF-8 and (b) Ag/AgCl@ZIF-8, TEM image of (c) Ag/AgCl@ZIF-8.

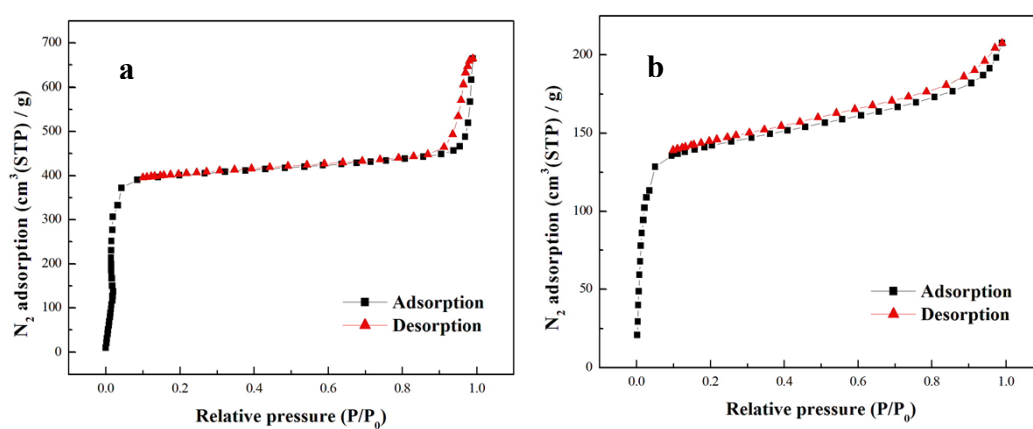

**Fig. S2** Nitrogen adsorption-desorption isotherms of (a) ZIF-8 and (b) Ag/AgCl@ZIF-8.

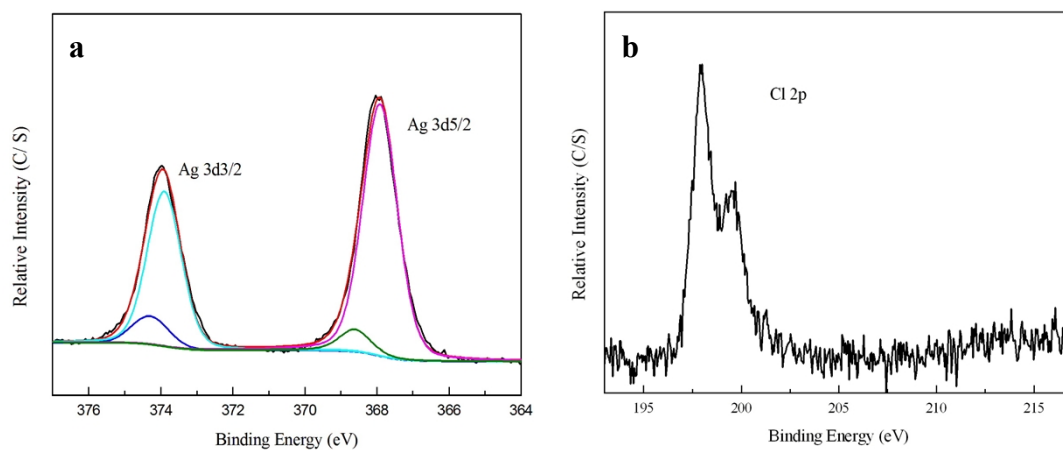

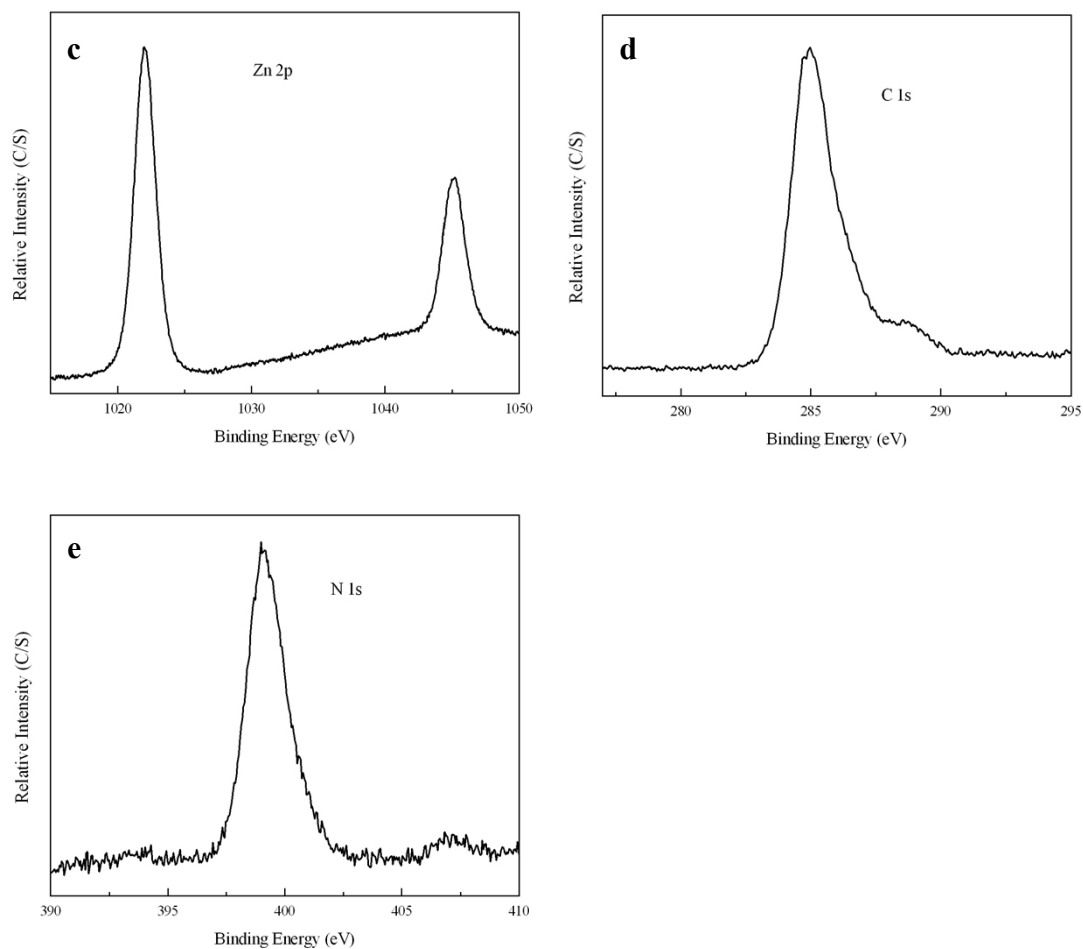

**Figure S3.** High-resolution XPS spectrum of (a) Ag 3d; (b) Cl 2p; (c) Zn 2p; (d) C 1s and (e) N 1s .

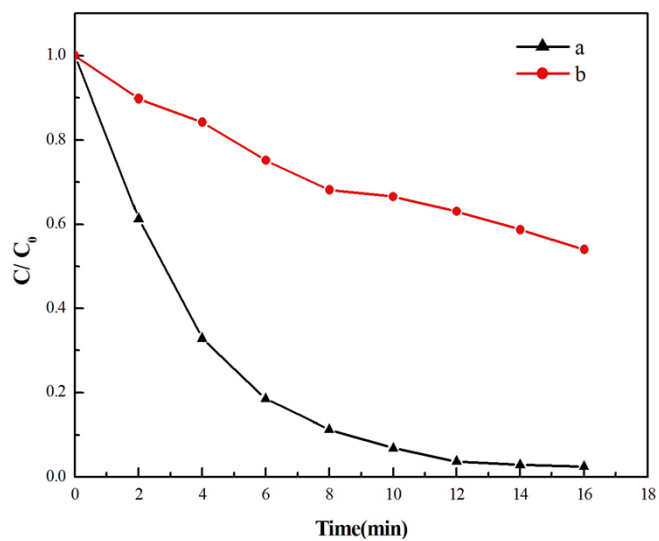

**Figure S4.** The photodegradation of RhB with (a) 35 wt.% Ag/AgCl@ZIF-8 and (b) the mixture of the Ag/AgCl and ZIF-8.
